# Supplementary material
Source: publisher figshare collection journal article supplement (https://acs.figshare.com/ndownloader/files/22057791)
Supplement: Supplementary file 1 [file 22057791]

## **LISICON-Based Amorphous Oxide for Bulk-Type All-Solid-State Lithium-Ion Battery**

Toyoki Okumura,<sup>\*,†</sup> Sou Taminato,<sup>†,§</sup> Yoshinobu Miyazaki,<sup>‡</sup> Michinori Kitamura,<sup>‡</sup> Tomohiro Saito,<sup>‡</sup> Tomonari Takeuchi,<sup>†</sup> and Hironori Kobayashi<sup>†</sup>

<sup>†</sup> Research Institute of Electrochemical Energy, National Institute of Advanced Industrial Science and Technology (AIST), 1-8-31 Midorigaoka, Ikeda, Osaka 563-8577, Japan

<sup>‡</sup> Tsukuba Laboratory, Technical Solution Headquarters, Sumika Chemical Analysis Service (SCAS), Ltd., 6 Kitahara, Tsukuba, Ibaraki 300-3266, Japan

<sup>§</sup> Department of Chemistry, Mie University, 1577 Kurimamachiya-cho, Tsu, Mie 514-8507, Japan

**KEYWORDS:** all-solid-state Li-ion battery, LISICON, solid-state electrolyte, spark-plasma sintering, low-temperature densification

\*E-mail: toyoki-okumura@aist.go.jp

## Phenomena under ball-milling

The solo-LGPO powder ( $x = 0$ ) likely adhered to the bottom corners of the  $\text{ZrO}_2$  pot after treatment. Therefore, the long-period arrangement of the crystalline LGPO was difficult to break, even though the adhered powder was raked out several times during the treatment. On the other hand, the LGPO- $\text{Li}_3\text{BO}_3$  blended powder was more likely to adhere to the surfaces of the  $\text{ZrO}_2$  balls than to the walls of the  $\text{ZrO}_2$  pot, resulting in a thicker covering of the balls with increased  $\text{Li}_3\text{BO}_3$  additive ratio. Thus, the amorphization of LGPO- $\text{Li}_3\text{BO}_3$  was promoted by introducing an effective impact via  $\text{ZrO}_2$  balls to the covered powder. Actually, slight peaks remained in the treated LGPO with a low  $\text{Li}_3\text{BO}_3$  additive amount ( $x = 1/7$ ) associated with the increase in bottom-corner adhesion. On the other hand, crystalline peaks were also confirmed from solo- $\text{Li}_3\text{BO}_3$  ( $x = 1$ ) in spite of the effective treatment achieved by the  $\text{Li}_3\text{BO}_3$ -covered balls [Figure 1(h)]. These peaks indicate that the compositional combination of LGPO and  $\text{Li}_3\text{BO}_3$ , in addition to the ball-adhering effect by  $\text{Li}_3\text{BO}_3$  additive, was also important for amorphization.

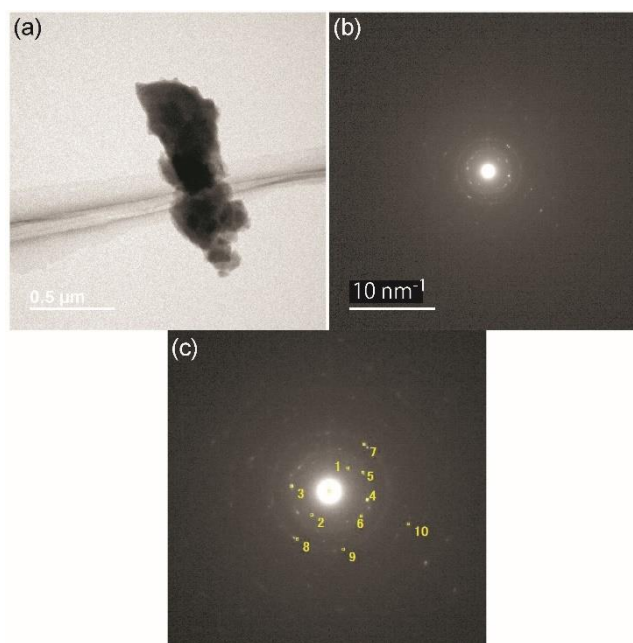

**Figure S1.** (a) Bright-field TEM image and (b) selected-area electron diffraction of crystalline LGPO electrolyte. (c) Selected diffraction spots for estimating the reflection planes of LGPO.

**Table S1.** Reflection planes of LGPO corresponding to selected diffraction spots in Figure S1(c).

| Spot number | $d^* / \text{nm}^{-1}$ | Amplitude | Reflection plane candidate of $\text{Li}_{3.75}\text{Ge}_{0.75}\text{P}_{0.25}\text{O}_4$ |
|-------------|------------------------|-----------|-------------------------------------------------------------------------------------------|
| #1          | 1.88                   | 1377      | 2 0 0                                                                                     |
| #2          | 1.86                   | 1311      | 2 0 0                                                                                     |
| #3          | 2.40                   | 2430      | 2 1 0                                                                                     |
| #4          | 2.50                   | 3645      | 2 1 0 or 0 1 1                                                                            |
| #5          | 2.46                   | 1680      | 2 1 0 or 0 1 1                                                                            |
| #6          | 2.59                   | 1380      | 0 1 1 or 2 0 1                                                                            |
| #7          | 3.71                   | 2522      | 2 2 0, 4 0 0, or 3 1 1                                                                    |
| #8          | 3.66                   | 1299      | 2 2 0, 4 0 0, or 3 1 1                                                                    |
| #9          | 3.80                   | 740       | 2 2 0, 4 0 0, or 3 1 1                                                                    |
| #10         | 5.46                   | 1037      | 4 0 2 or 2 2 2                                                                            |

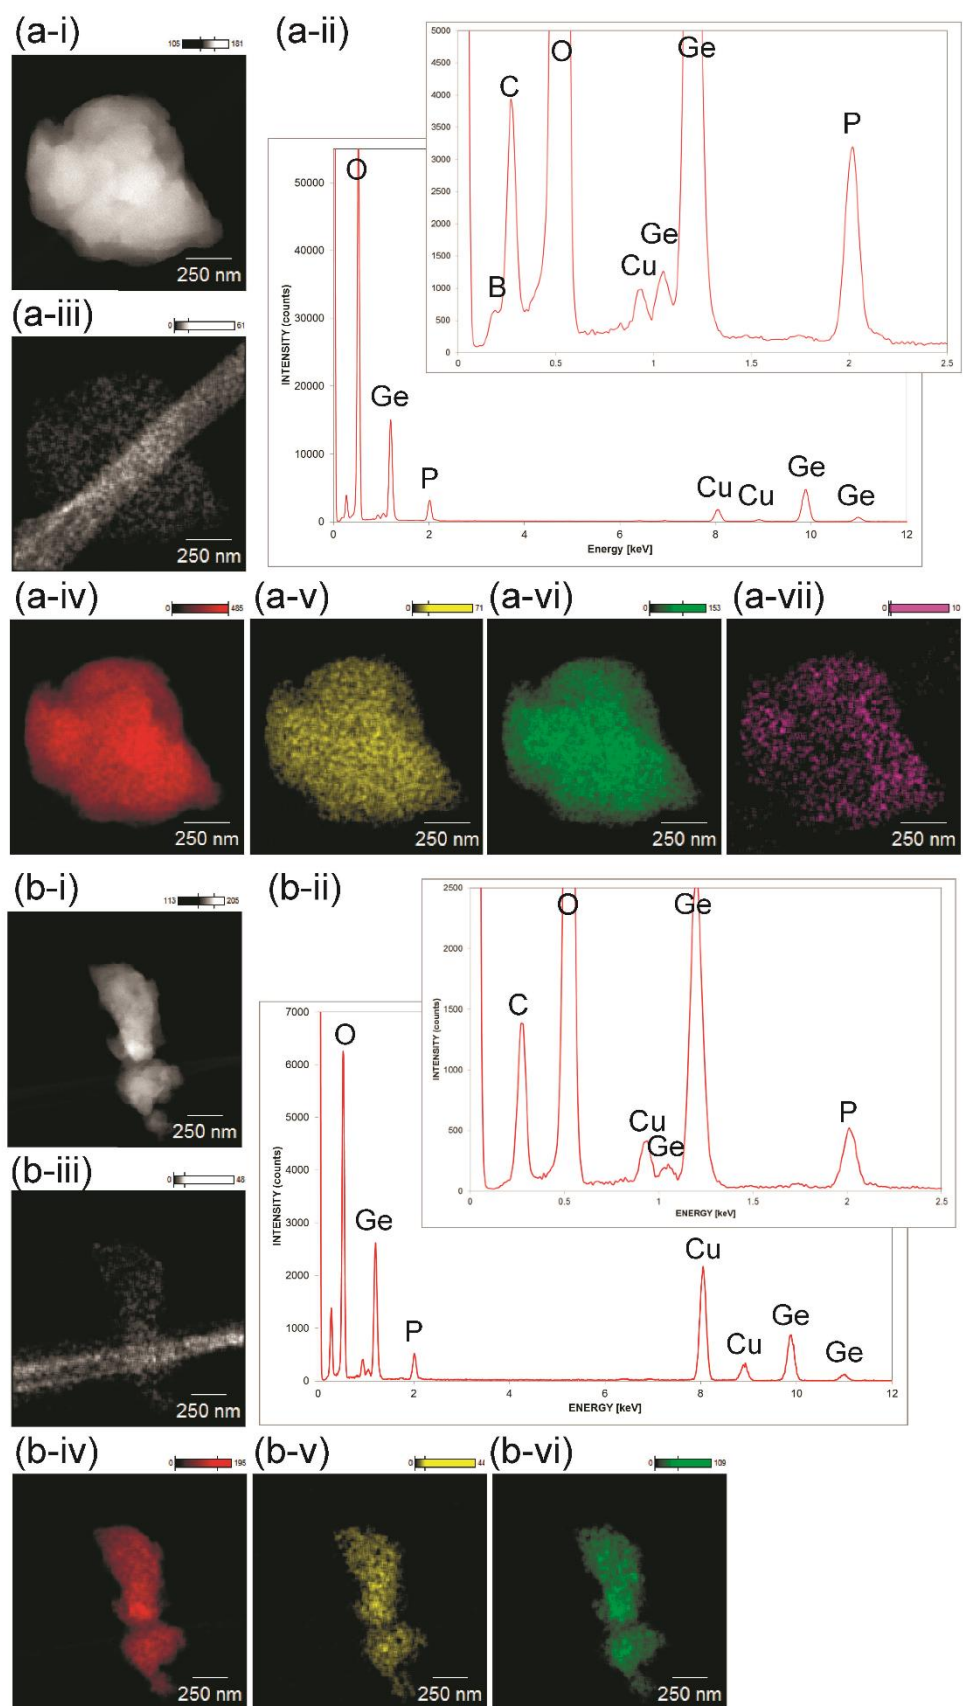

**Figure S2.** STEM-EDS results of (a) amorphous 0.5LGPO-0.5Li<sub>3</sub>BO<sub>3</sub> and (b) LGPO; (i) STEM image, (ii) EDS spectrum, and STEM-EDS mappings of (iii) C, (iv) O, (v) P, (vi) Ge, and (vii) B.

## Wide amorphization permissibility of LISICON-based oxides

The amorphization of LISICON-based oxides was attempted with other LISICON-borate additive combinations, whose powder XRD patterns are shown in Figure S3. Amorphous halo patterns were confirmed in all of the LISICON- $\text{Li}_3\text{BO}_3$  samples in the present study with crystalline LISICON phases of  $\gamma\text{-Li}_3\text{PO}_4$ -type  $\text{Li}_{3.5}\text{Ge}_{0.5}\text{V}_{0.5}\text{O}_4$ ,  $\gamma\text{-Li}_3\text{PO}_4$ -type  $\text{Li}_{3.5}\text{Ge}_{0.75}\text{S}_{0.25}\text{O}_4$ , and  $\text{Li}_4\text{SiO}_4$ -type  $\text{Li}_{3.625}\text{Si}_{0.375}\text{Al}_{0.125}\text{P}_{0.5}\text{O}_4$  [Figure S3(a-c)]. ( $\text{Li}_4\text{SiO}_4$ -type ionic conductors have sometimes been included in the LISICON family.) Moreover, a similar LISICON-based amorphous phase could also be prepared from other borate additives such as  $\text{Li}_4\text{B}_2\text{O}_5$ ,  $\text{LiBO}_2$ , and  $\text{B}_2\text{O}_3$  [Figure S3(d-f)] in spite of their structural differences, resulting in different chain-network structures consisting of  $\text{BO}_3^{3-}$  triangles and  $\text{BO}_4^{5-}$  tetrahedrons. Therefore, LISICON-based amorphous materials could also be prepared with various borate additives. We also attempted to prepare amorphous electrolytes with other electrolyte candidates (NASICON-type, perovskite-type, and garnet-type oxides) and other Li-salt additives ( $\text{Li}_2\text{CO}_3$ ,  $\text{Li}_{2.2}\text{C}_{0.8}\text{B}_{0.2}\text{O}_3$ , and  $\text{LiNO}_3$ ), whose powder XRD patterns and conductivities are shown in Figure S4 and Table S2, respectively. In most cases, crystalline phases remained in other electrolyte-additive combinations after the ball-milling treatment, while some advantages were confirmed from carbonate additives. Although a NASICON-type electrolyte was also suitable for preparing the amorphous electrolyte by ball-milling with a borate additive, the conductivity was quite low at  $3.2 \times 10^{-8} \text{ S cm}^{-1}$ .

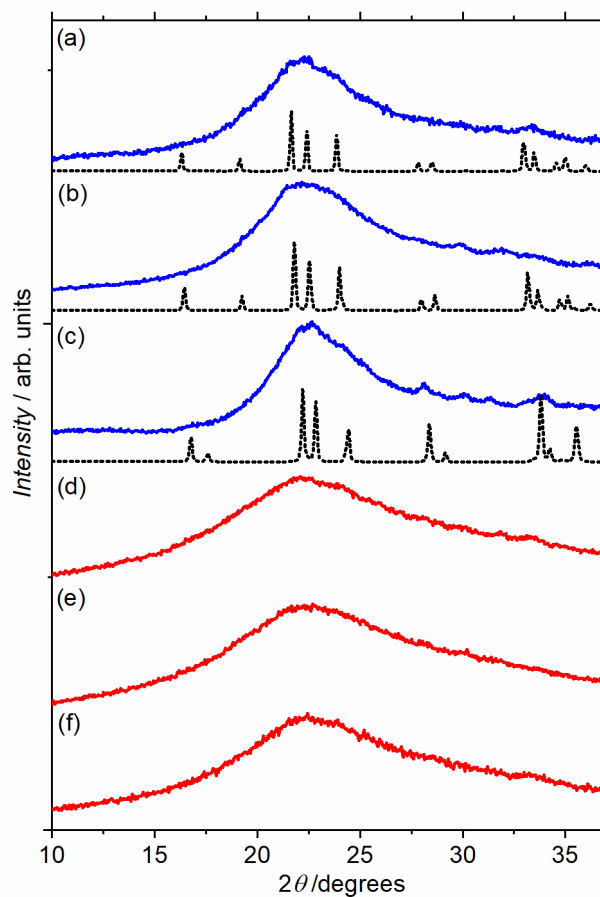

**Figure S3.** Powder XRD patterns of (a)  $0.5\text{Li}_{3.5}\text{Ge}_{0.5}\text{V}_{0.5}\text{O}_4\text{-}0.5\text{Li}_3\text{BO}_3$ , (b)  $0.5\text{Li}_{3.5}\text{Ge}_{0.75}\text{S}_{0.25}\text{O}_4\text{-}0.5\text{Li}_3\text{BO}_3$ , (c)  $0.5\text{Li}_{3.625}\text{Si}_{0.375}\text{Al}_{0.125}\text{P}_{0.5}\text{O}_4\text{-}0.5\text{Li}_3\text{BO}_3$ , (d)  $0.5\text{Li}_{3.5}\text{Ge}_{0.5}\text{P}_{0.5}\text{O}_4\text{-}0.25\text{Li}_4\text{B}_2\text{O}_5$ , (e)  $0.5\text{Li}_{3.5}\text{Ge}_{0.5}\text{P}_{0.5}\text{O}_4\text{-}0.5\text{LiBO}_2$ , and (f)  $0.5\text{Li}_{3.5}\text{Ge}_{0.5}\text{P}_{0.5}\text{O}_4\text{-}0.25\text{B}_2\text{O}_3$  after ball-milling treatment. The patterns of crystalline (a)  $\text{Li}_{3.5}\text{Ge}_{0.5}\text{V}_{0.5}\text{O}_4$ , (b)  $\text{Li}_{3.5}\text{Ge}_{0.75}\text{S}_{0.25}\text{O}_4$ , and (c)  $\text{Li}_{3.625}\text{Si}_{0.375}\text{Al}_{0.125}\text{P}_{0.5}\text{O}_4$  are also shown as dashed lines.

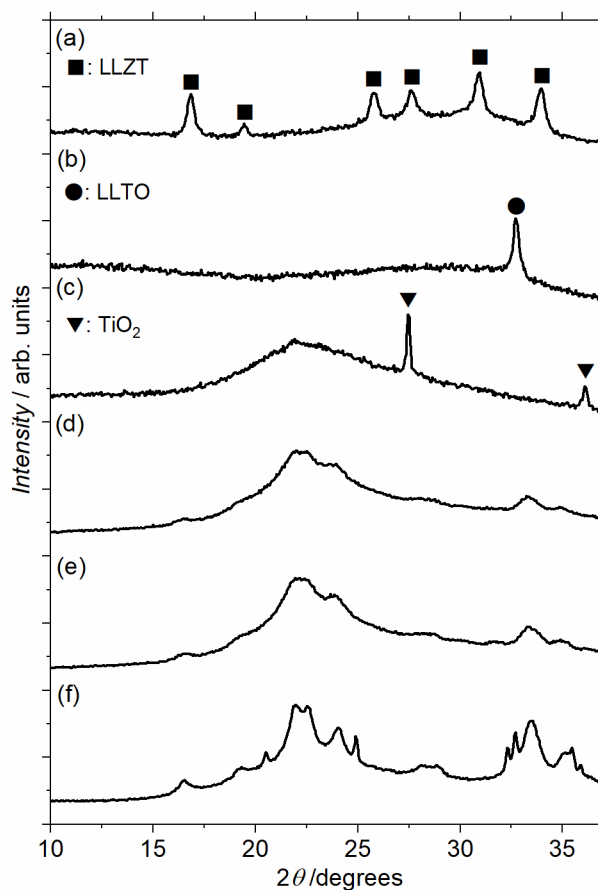

**Figure S4.** Powder XRD patterns of (a) 0.25[garnet-type  $\text{Li}_{6.5}\text{La}_3\text{Zr}_{1.5}\text{Ta}_{0.5}\text{O}_{12}$  (LLZT)]-0.75 $\text{Li}_3\text{BO}_3$ , (b) 0.5[perovskite-type  $\text{Li}_{0.33}\text{La}_{0.56}\text{TiO}_3$  (LLTO)]-0.5 $\text{Li}_3\text{BO}_3$ , (c) 0.25[NASICON-type Al-doped  $\text{LiTi}_2(\text{PO}_4)_3$ ]-0.75 $\text{Li}_3\text{BO}_3$ , (d) 0.5LGPO-0.5 $\text{Li}_2\text{CO}_3$ , (e) 0.5LGPO-0.5 $\text{Li}_{2.2}\text{C}_{0.8}\text{B}_{0.2}\text{O}_3$ , and (f) 0.5LGPO-0.5 $\text{LiNO}_3$  after ball-milling treatment.

**Table S2.** Conductivities at 25 °C for various Li-ion conductive oxide-additive blended electrolytes by ball-milling treatment.

| Li-ion conductive oxide                                                 | Additive                                                | Blending molar ratio | Conductivity at 25 °C / S cm <sup>-1</sup> |
|-------------------------------------------------------------------------|---------------------------------------------------------|----------------------|--------------------------------------------|
| $\text{Li}_{3.75}\text{Ge}_{0.75}\text{P}_{0.25}\text{O}_4$             | $\text{Li}_3\text{BO}_3$                                | 1 : 1                | $1.5 \times 10^{-6}$                       |
| $\text{Li}_{3.75}\text{Ge}_{0.75}\text{P}_{0.25}\text{O}_4$             | -                                                       | 1 : 0                | $6.3 \times 10^{-7}$                       |
| $\text{Li}_{3.75}\text{Ge}_{0.75}\text{P}_{0.25}\text{O}_4$             | $\text{LiBO}_2$                                         | 1 : 1                | $1.0 \times 10^{-7}$                       |
| $\text{Li}_{3.75}\text{Ge}_{0.75}\text{P}_{0.25}\text{O}_4$             | $\text{B}_2\text{O}_3$                                  | 2 : 1                | $1.4 \times 10^{-8}$                       |
| $\text{Li}_{6.6}\text{La}_3\text{Zr}_{1.6}\text{Ta}_{0.4}\text{O}_{12}$ | $\text{Li}_3\text{BO}_3$                                | 1 : 3                | unmeasurable                               |
| $\text{Li}_{0.33}\text{La}_{0.56}\text{TiO}_3$                          | $\text{Li}_3\text{BO}_3$                                | 1 : 1                | unmeasurable                               |
| Al-doped $\text{LiTi}_2(\text{PO}_4)_3$                                 | $\text{Li}_3\text{BO}_3$                                | 1 : 3                | $3.2 \times 10^{-8}$                       |
| $\text{Li}_{3.75}\text{Ge}_{0.75}\text{P}_{0.25}\text{O}_4$             | $\text{Li}_2\text{CO}_3$                                | 1 : 1                | $9.5 \times 10^{-7}$                       |
| $\text{Li}_{3.75}\text{Ge}_{0.75}\text{P}_{0.25}\text{O}_4$             | $\text{Li}_{2.2}\text{C}_{0.8}\text{B}_{0.2}\text{O}_3$ | 1 : 1                | $9.3 \times 10^{-7}$                       |
| $\text{Li}_{3.75}\text{Ge}_{0.75}\text{P}_{0.25}\text{O}_4$             | $\text{LiNO}_3$                                         | 1 : 1                | $1.8 \times 10^{-7}$                       |

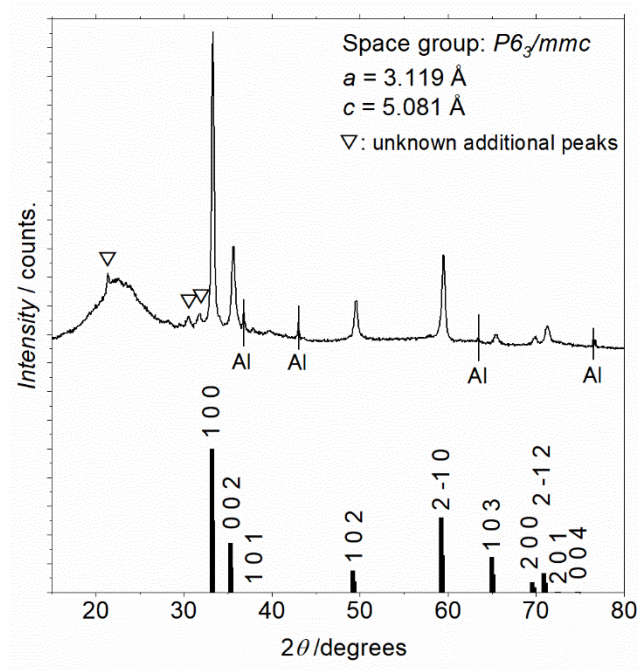

**Figure S5.** Powder XRD patterns of amorphous 0.5LGPO-0.5Li<sub>3</sub>BO<sub>3</sub> after heat treatment at 400 °C and simulated pattern of hexagonal structure (space group:  $P6_3/mmc$ ).

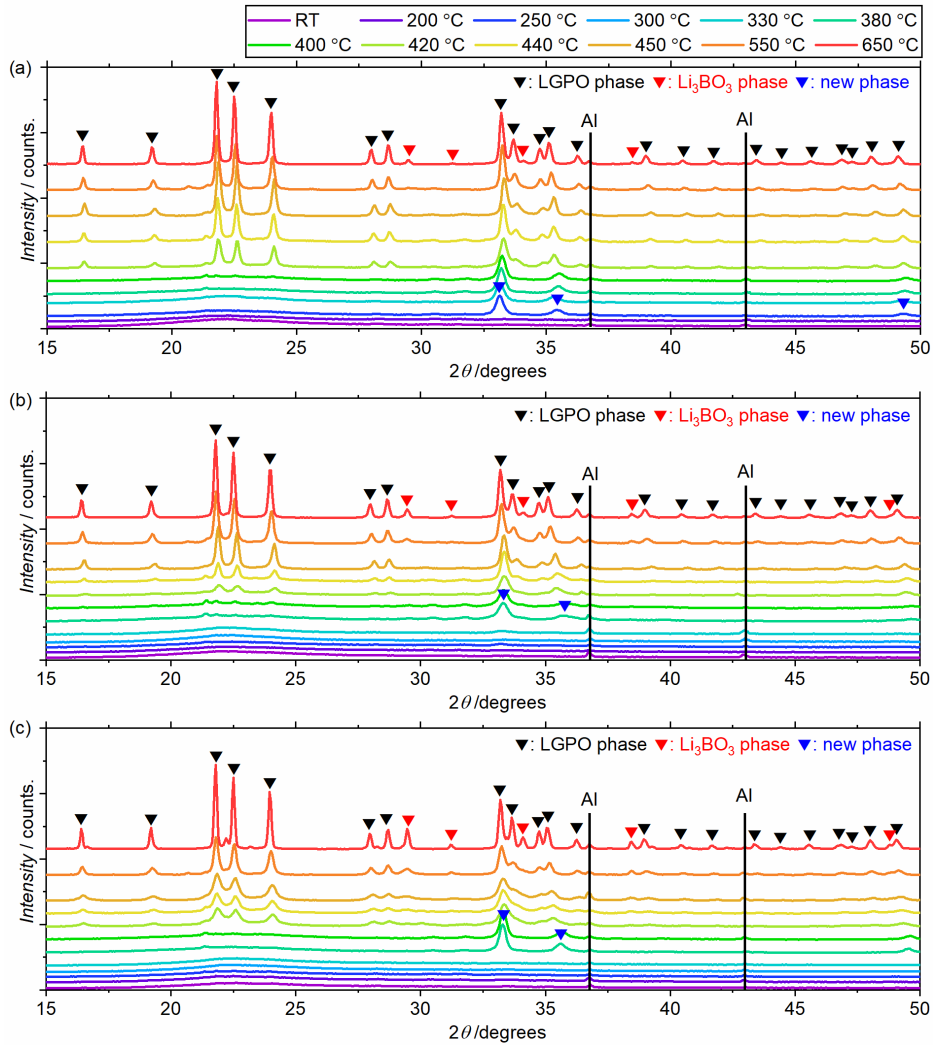

**Figure S6.** XRD patterns of (a) 0.8LGPO-0.2Li<sub>3</sub>BO<sub>3</sub>, (b) 0.67LGPO-0.33Li<sub>3</sub>BO<sub>3</sub>, and (c) 0.5LGPO-0.5Li<sub>3</sub>BO<sub>3</sub> amorphous compacts after heat treatment at various temperatures.



## Ionic conductivities and microstructures after heat treatment

Figure S7 shows Arrhenius plots for the ionic conductivities of the uniaxially pressed  $(1-x)\text{LGPO}-x\text{Li}_3\text{BO}_3$  amorphous compacts ( $x = 0.2, 0.33, 0.5$ ) and of pure LGPO sintered by SPS at various operating temperatures. As discussed above, the conductivity of the 700-°C-heated  $(1-x)\text{LGPO}-x\text{Li}_3\text{BO}_3$  compact was close to but slightly less than that of the pure LGPO sintered compact at each temperature since mixing of the low-conductivity  $\text{Li}_3\text{BO}_3$  additive reduces the total conductivity. However, the activation energy for ionic conduction of  $(1-x)\text{LGPO}-x\text{Li}_3\text{BO}_3$ ,  $E_a = 0.48$  eV, estimated from the slope of the Arrhenius plots did not change with the  $\text{Li}_3\text{BO}_3$  additive ratio and was similar to that of the pure LGPO sintered compact ( $E_a = 0.47$  eV), as summarized in Table S3. To investigate this observation, the microstructure of the 700-°C-heated  $(1-x)\text{LGPO}-x\text{Li}_3\text{BO}_3$  compacts was observed. As illustrated in Figure S8(a-c), the LGPO crystalline grains (light-gray) and  $\text{Li}_3\text{BO}_3$  crystalline grains (dark-gray or black) nucleated separately, which agrees with the XRD results [Figure S6(a-c)]. Additionally, the SEM-EDX mappings of Ge in Figure S8(d-f) confirm the distribution of LGPO crystalline grains (green) in the compacts. For samples with less  $\text{Li}_3\text{BO}_3$  additive ( $x = 0.2$  or  $0.33$ ), the compact was mostly formed by connected LGPO crystalline grains, and the  $\text{Li}_3\text{BO}_3$  crystalline grains (or pores) filled in the gaps. The LGPO-connected paths became thin with an increased amount of  $\text{Li}_3\text{BO}_3$  additive ( $x = 0.5$ ) in the compact but were still connected and associated with the formation of an LGPO mesh network. Therefore, the increase in low-conductivity  $\text{Li}_3\text{BO}_3$  additive resulted in a decrease in the pre-exponential factor but did not affect the activation energy  $E_a$ .

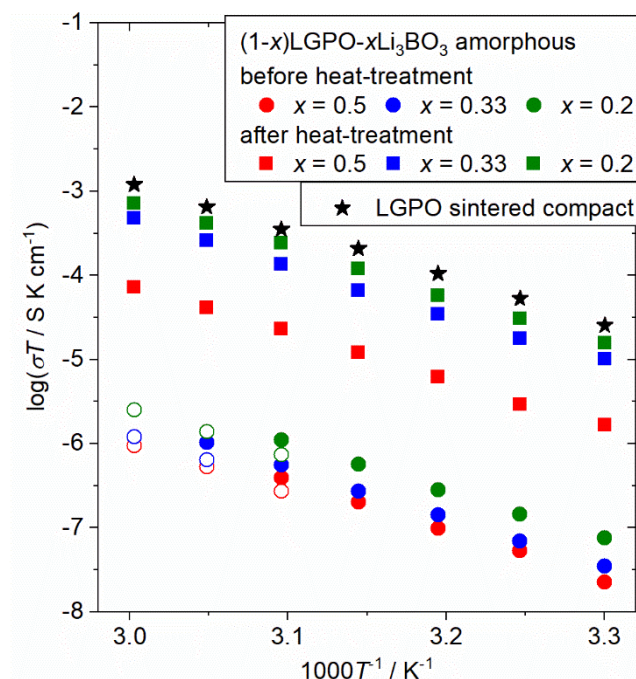

**Figure S7.** Arrhenius plots of ionic conductivities estimated from Nyquist plots of Au/uniaxially pressed (1-x)LGPO-xLi<sub>3</sub>BO<sub>3</sub> amorphous pellet/Au ( $x = 0.2, 0.33, 0.5$ ) at various operating temperatures before heat treatment (circles) and after 700-°C heat treatment (squares). Those of Au/pure LGPO sintered pellet/Au are also shown (stars).

**Table S3.** Activation energies  $E_a$  for ionic conduction of LGPO and (1-x)LGPO-xLi<sub>3</sub>BO<sub>3</sub> estimated from the slope of the Arrhenius plots

|                                                                                                                 | Activation energy $E_a$ / eV |
|-----------------------------------------------------------------------------------------------------------------|------------------------------|
| Li <sub>3.75</sub> Ge <sub>0.75</sub> P <sub>0.25</sub> O <sub>4</sub> (LGPO) compact sintered by SPS at 800 °C | 0.47                         |
| Amorphous 0.8LGPO-0.2Li <sub>3</sub> BO <sub>3</sub> before heat treatment                                      | 0.51                         |
| Amorphous 0.67LGPO-0.33Li <sub>3</sub> BO <sub>3</sub> before heat treatment                                    | 0.49                         |
| Amorphous 0.5LGPO-0.5Li <sub>3</sub> BO <sub>3</sub> before heat treatment                                      | 0.50                         |
| Amorphous 0.8LGPO-0.2Li <sub>3</sub> BO <sub>3</sub> after 700-°C heat treatment                                | 0.48                         |
| Amorphous 0.67LGPO-0.33Li <sub>3</sub> BO <sub>3</sub> after 700-°C heat treatment                              | 0.48                         |
| Amorphous 0.5LGPO-0.5Li <sub>3</sub> BO <sub>3</sub> after 700-°C heat treatment                                | 0.48                         |

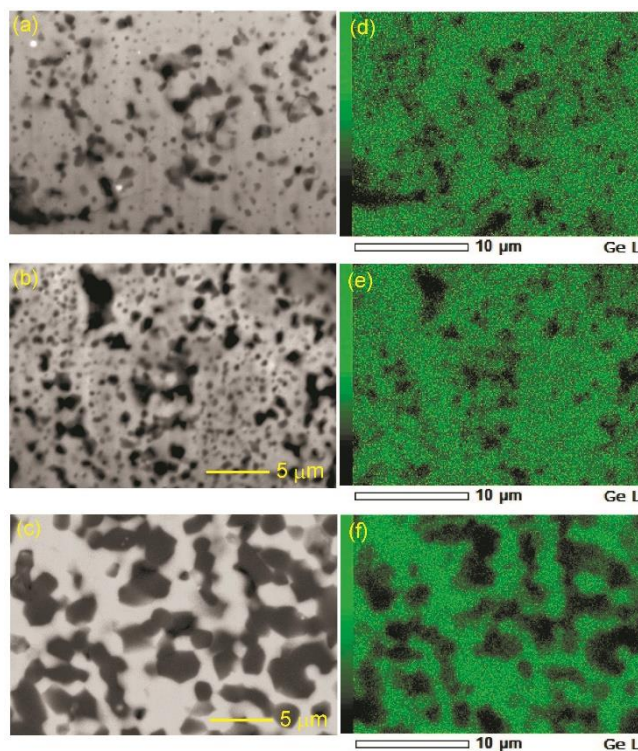

**Figure S8.** Cross-sectional SEM images of  $(1-x)\text{LGPO}-x\text{Li}_3\text{BO}_3$  amorphous compacts [(a)  $x = 0.2$ , (b)  $x = 0.33$ , and (c)  $x = 0.5$ ] after 700-°C heat treatment. SEM-EDX mappings of Ge [(d)  $x = 0.2$ , (e)  $x = 0.33$ , and (f)  $x = 0.5$ ].

**Table S4.** Ionic conductivities of 0.5LGPO-0.5Li<sub>3</sub>BO<sub>3</sub> amorphous compacts operated at 25 °C before and after heat treatment under various conditions.

| 0.5LGPO-0.5Li <sub>3</sub> BO <sub>3</sub> amorphous electrolyte     | Conductivities<br>at 25 °C / S cm <sup>-1</sup> |
|----------------------------------------------------------------------|-------------------------------------------------|
| Only pressing at 800 MPa                                             | $1.5 \times 10^{-6}$                            |
| Heating uniaxial compact at 700 °C for 2 h in a conventional furnace | $1.1 \times 10^{-5}$                            |
| Heating at 300 °C for 1 min with a pressure of 400 MPa by SPS        | $5.0 \times 10^{-6}$                            |
| Heating at 400 °C for 1 min with a pressure of 400 MPa by SPS        | $6.3 \times 10^{-6}$                            |
| Heating at 500 °C for 1 min with a pressure of 400 MPa by SPS        | $9.5 \times 10^{-7}$                            |

**Table S5.** Reflection planes of amorphous 0.5LGPO-0.5Li<sub>3</sub>BO<sub>3</sub> after SPS heat treatment at 400 °C corresponding to selected diffraction spots in Figure 5(d).

| Spot number | $d^*$ / nm <sup>-1</sup> | Reflection plane candidate of<br>Li <sub>3.75</sub> Ge <sub>0.75</sub> P <sub>0.25</sub> O <sub>4</sub> |
|-------------|--------------------------|---------------------------------------------------------------------------------------------------------|
| ring-a      | 2.55                     | 2 1 0 or 0 1 1                                                                                          |
| ring-b      | 3.71                     | 2 2 0, 4 0 0, or 3 1 1                                                                                  |
| ring-c      | 6.42                     | 6 2 0 or 0 4 0                                                                                          |
| #1          | 3.91                     | 2 0 0                                                                                                   |
| #2          | 3.96                     | 2 0 0                                                                                                   |
| #3          | 3.96                     | 2 0 0                                                                                                   |
| #4          | 5.31                     | 4 0 2 or 2 2 2                                                                                          |
| #5          | 5.37                     | 4 0 2 or 2 2 2                                                                                          |

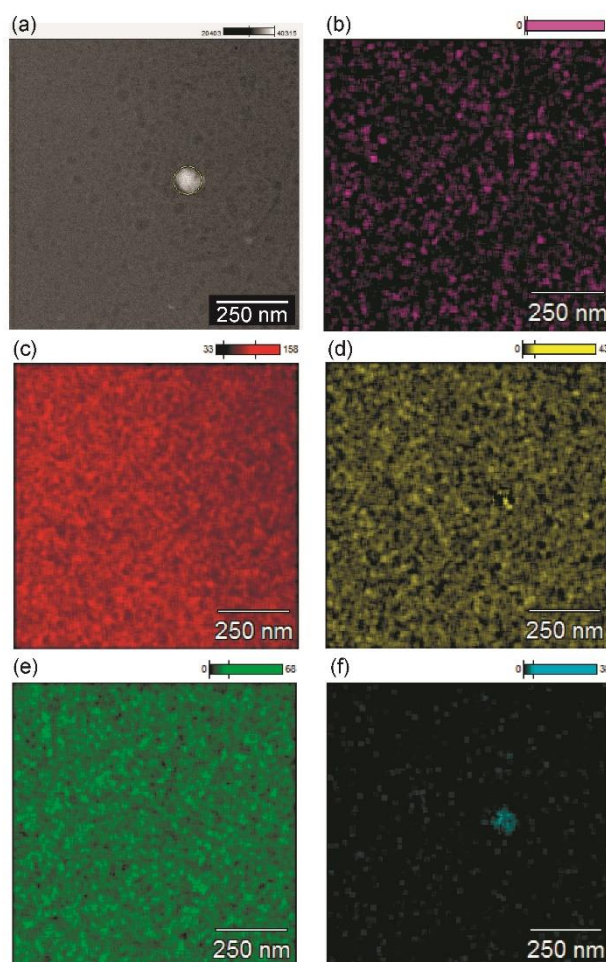

**Figure S9.** STEM-EDS results of 400-°C-SPS 0.5LGPO-0.5Li<sub>3</sub>BO<sub>3</sub> compact; (a) STEM image and STEM-EDS mappings of (b) B, (c) O, (d) P, (e) Ge, and (f) Zr.

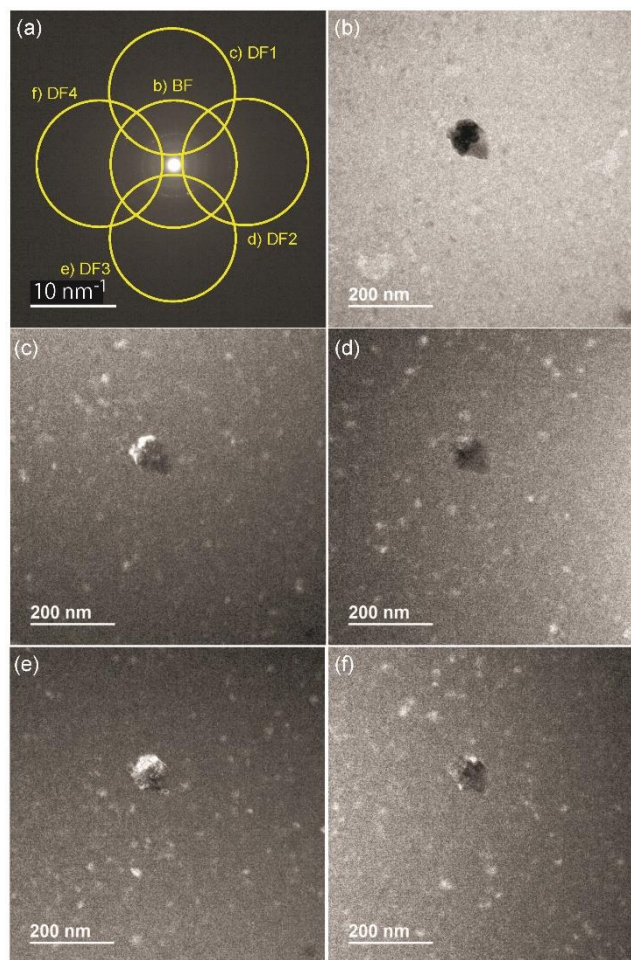

**Figure S10.** (a) Objective aperture locations for bright-field and dark-field TEM (yellow circles) in electron diffraction of 400-°C-SPS 0.5LGPO-0.5Li<sub>3</sub>BO<sub>3</sub> compact. (b) Bright-field TEM image taken with the aperture indicated as circle in (a). (c-f) Dark-field TEM images taken with the aperture location shown in (a). The large grain is ZrO<sub>2</sub> contamination.
